# Supplementary material for: A double-acceptor as a superior organic dye design for p-type DSSCs: high photocurrents and the observed light soaking effect
Source: Royal Society of Chemistry journal article supplement (doi:10.1039/c4cp04010d), 2014-01-01

# Supporting Information

## Double Acceptor Organic Dye Design for p-Type DSSCs: High Photocurrents and Observed Light Soaking Effect.

Kevin A. Click, Damian R. Beauchamp, Zhongjie Huang, Benjamin Garret, Yiying Wu

Department of Chemistry and Biochemistry, The Ohio State University, 100 West 18th Avenue, Columbus, Ohio 43210, United States

**Figure S1.** Cyclic voltammogram of 0.1mM BH series dyes in methylene chloride with a 0.1M tetrabutyl ammonium hexafluorophosphate supporting electrolyte. The scan rate was 100mV/s.

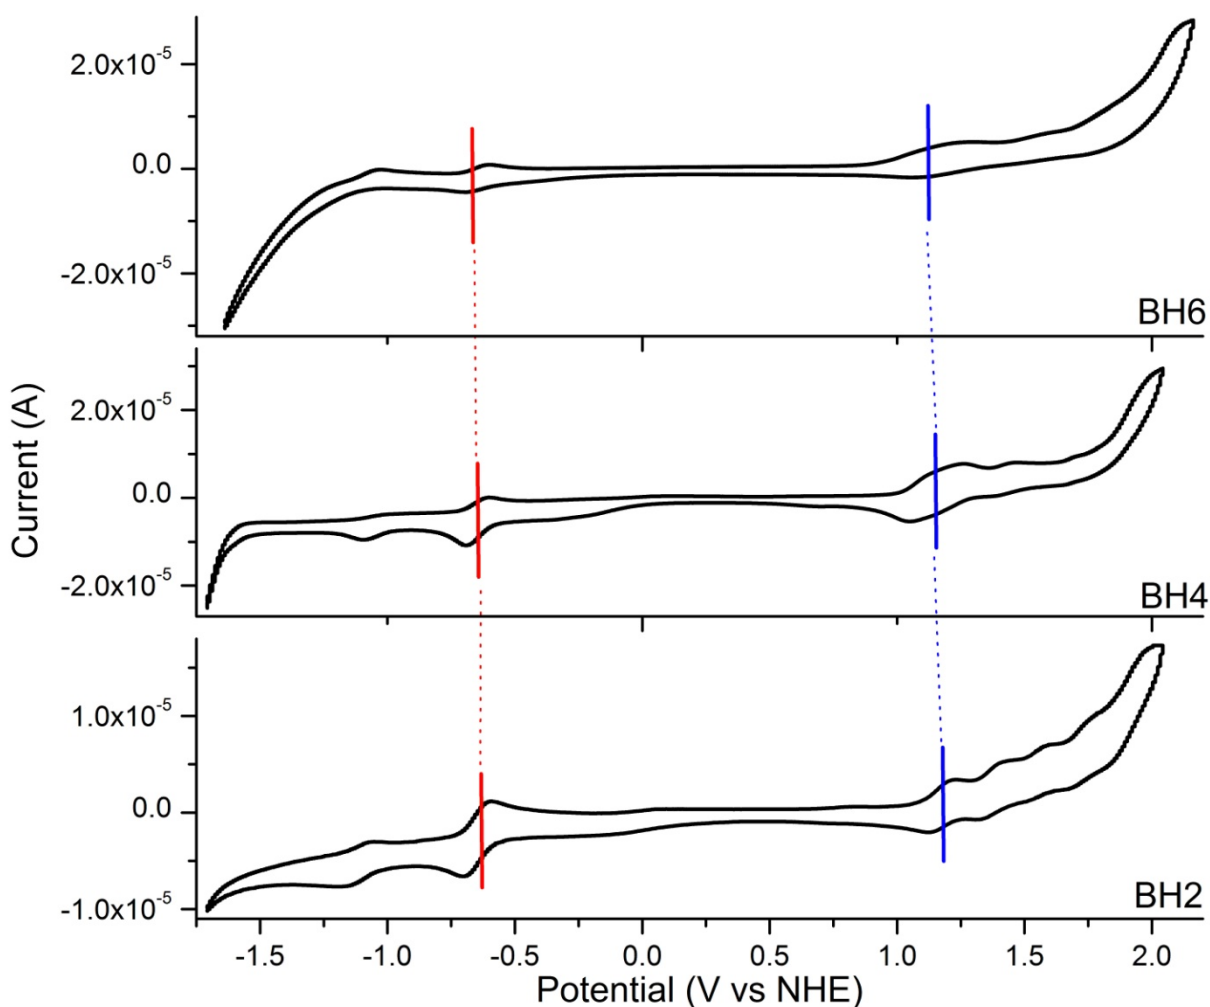

**Table S2.** Summary of all oxidation and reduction peaks of electrochemical measurements of dyes.

| Dye | $E_{\text{Red2}}$ [V] | $E_{\text{Red1}}$ [V] | $E_{\text{ox1}}$ [V] | $E_{\text{ox2}}$ [V] | $E_{\text{ox3}}$ [V] | $E_{\text{ox4}}$ [V] | $\Delta E_{\text{CV}}^b$ |
|-----|-----------------------|-----------------------|----------------------|----------------------|----------------------|----------------------|--------------------------|
| BH2 | -1.13                 | -0.65                 | 1.18                 | 1.37                 | 1.55                 | 1.73                 | 1.83                     |
| BH4 | -1.09 <sup>a</sup>    | -0.64                 | 1.16                 | 1.48 <sup>a</sup>    | 1.70 <sup>a</sup>    | N/A                  | 1.80                     |
| BH6 | 1.03 <sup>a</sup>     | -0.65                 | 1.14                 | 1.56 <sup>a</sup>    | N/A                  | N/A                  | 1.79                     |

[V] vs NHE. (a) Denotes irreversible oxidation/reduction peaks. (b)  $\Delta E_{\text{CV}}$  calculated by  $E_{\text{ox1}} - E_{\text{Red1}}$ .

**Figure S3.** Normalized absorption and Fluorescence in 0.01mM methylene chloride solution taken at room temperature.

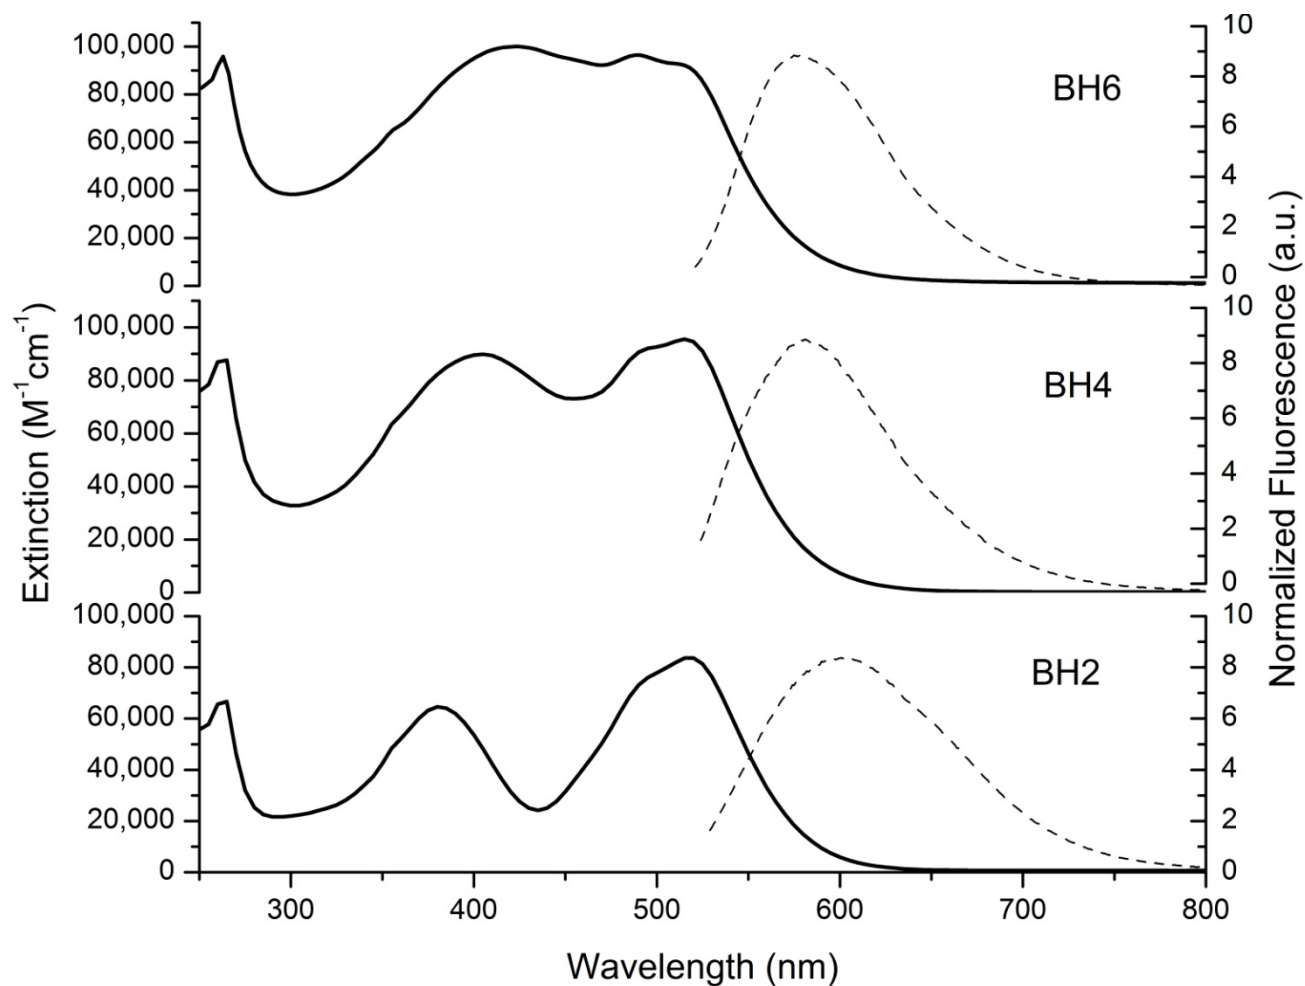

**Figure S4.** Voc as a function of light soaking process and time.

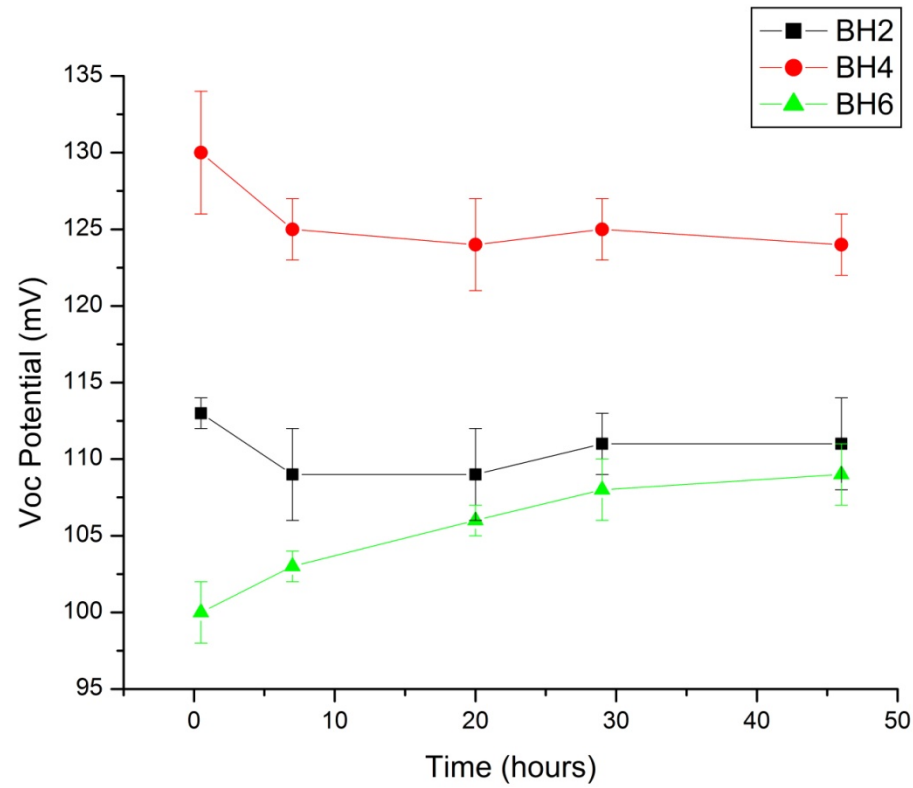

**Figure S5.** Capacitance measured at Voc for BH4 cells described in Table 4 and Figure 4. D is DMHII, L is Lil, and T is TBAI.

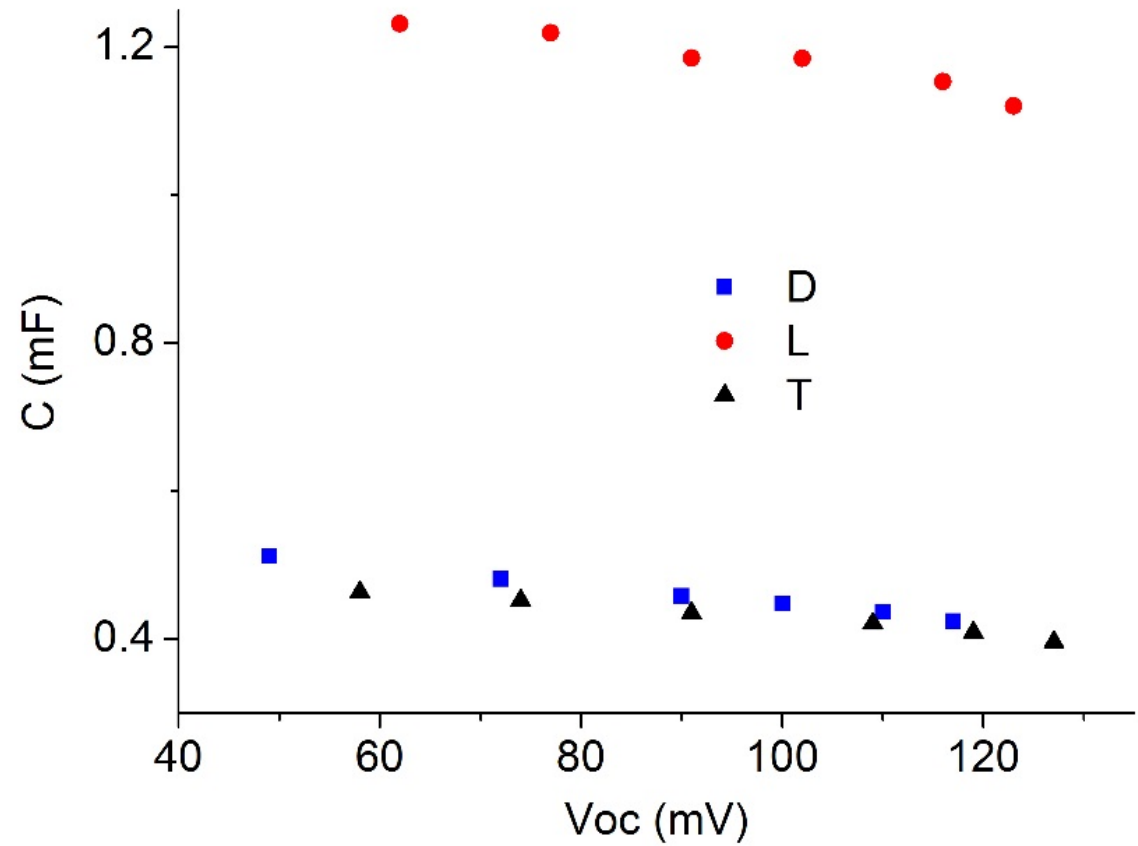

Supplement: c4cp04010d1.pdf [file c4cp04010d1.pdf]
